# Supplementary material for: The association of parents’ behaviors related to salt with 24 h urinary sodium excretion of their children: A Spanish cross-sectional study
Source: PubMed Central journal article supplement (PMC6934279; doi:10.1371/journal.pone.0227035), 2019-12-27

**S1 Fig. Adding table salt by the father and the mother.**

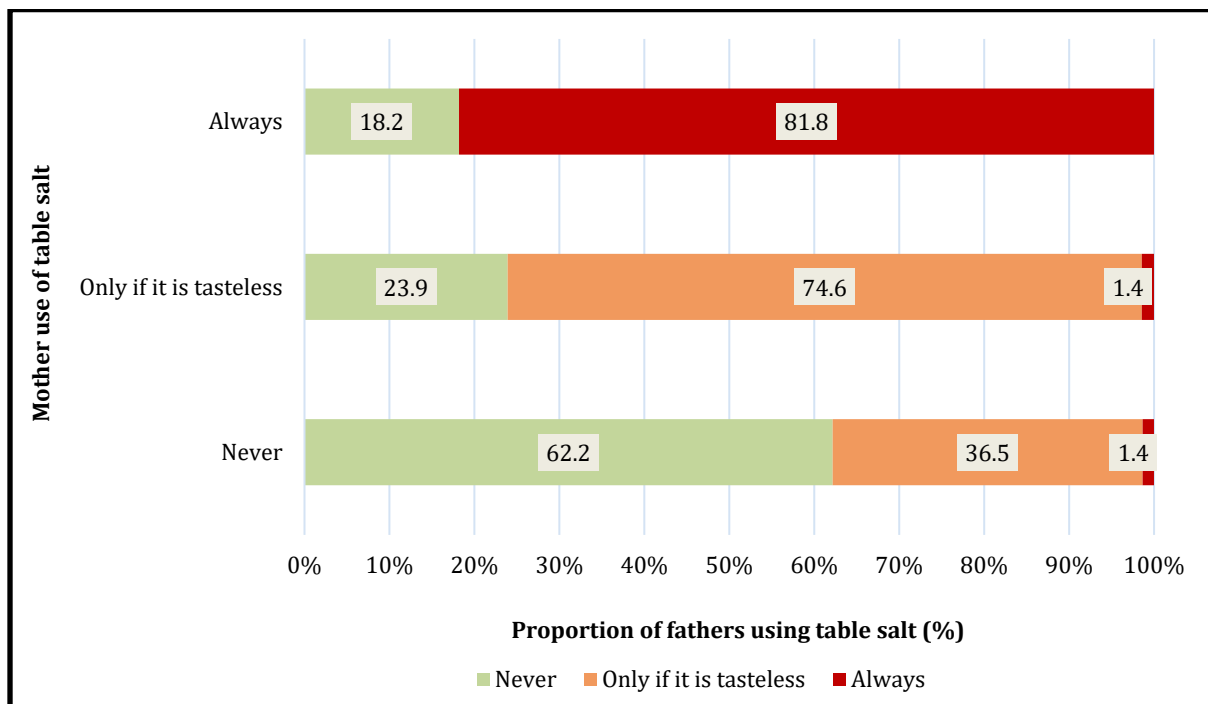

Supplement: pone.0227035.s001.pdf [file pone.0227035.s001.pdf]
